# Supplementary material for: Porcine milk-derived exosomes promote proliferation of intestinal epithelial cells
Source: PubMed Central journal article supplement (PMC5028765; doi:10.1038/srep33862), 2016-09-20
Supplement: srep33862-s1.pdf [file srep33862-s1.pdf]

## Porcine milk-derived exosomes promote proliferation of intestinal epithelial cells

Ting Chen<sup>§1</sup>, Mei-Ying Xie<sup>§1</sup>, Jia-Jie Sun<sup>1</sup>, Rui-Song Ye<sup>1</sup>, Xiao Cheng<sup>1</sup>, Rui-Ping Sun<sup>1</sup>, Li-Min Wei<sup>1</sup>, Meng Li<sup>1</sup>, De-Lin Lin<sup>1</sup>, Qing-Yan Jiang<sup>1</sup>, Qian-Yun Xi<sup>\*1</sup>, Yong-Liang Zhang<sup>\*1</sup>

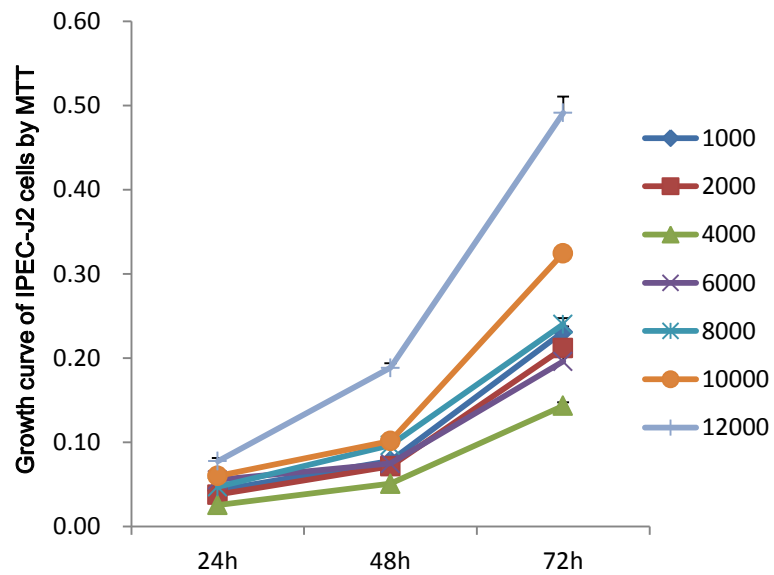

**Supplementary Figure 1.** Growth curve of IPEC-J2 cells by MTT assay. The OD value of 4,000–12,000 cells per/well displayed a good linear correlation at 48 h to 72 h after seeding (n=10).

100\*(48h)

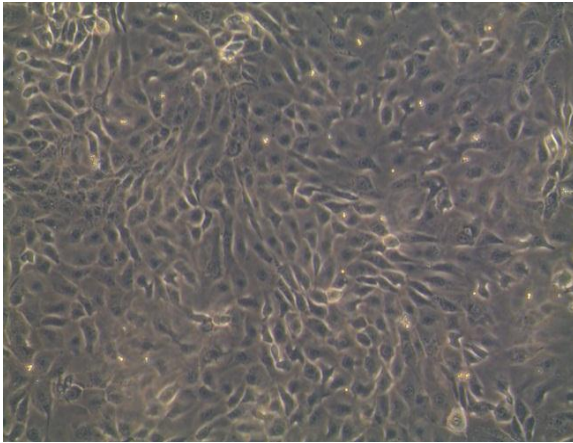

Exosomes ( $0.27 \pm 0.03 \mu\text{g}$ )

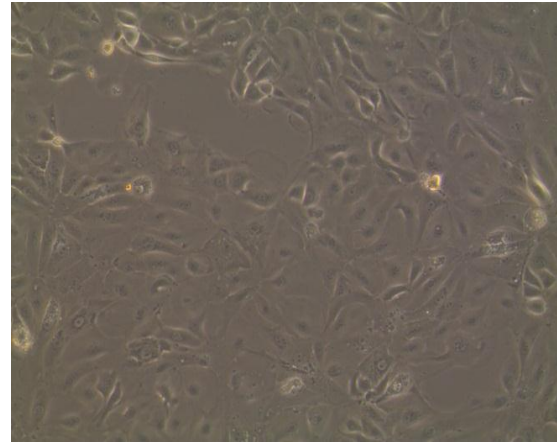

Control

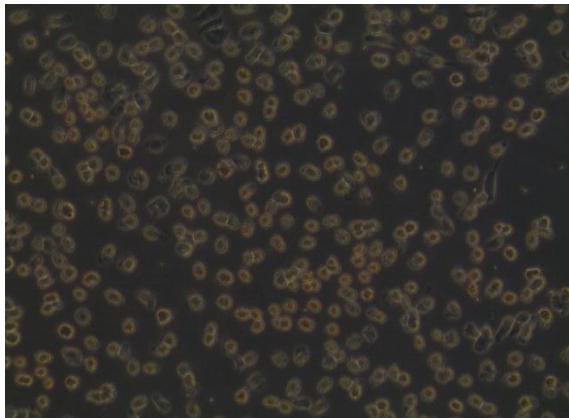

Exosomes ( $0.27 \pm 0.03 \mu\text{g}$  add digestive enzyme)

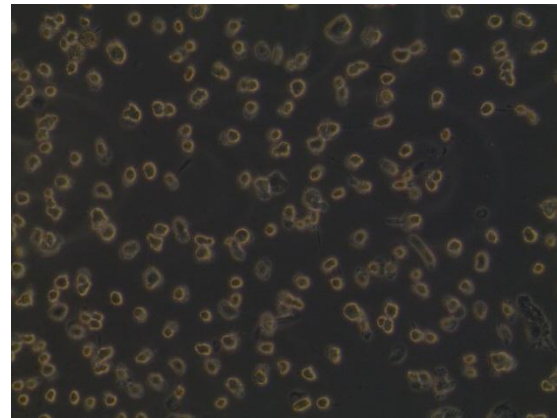

Control (add digestive enzyme)

**Supplementary Figure 2.** Microscopy examination of IPEC-J2 cell proliferation ( $27 \pm 3$  ng total RNA treatment group, 48 h). The number of IPEC-J2 cells was greater than the control group after treatment for 48 h with  $55 \pm 5$  ng porcine milk exosome RNA.

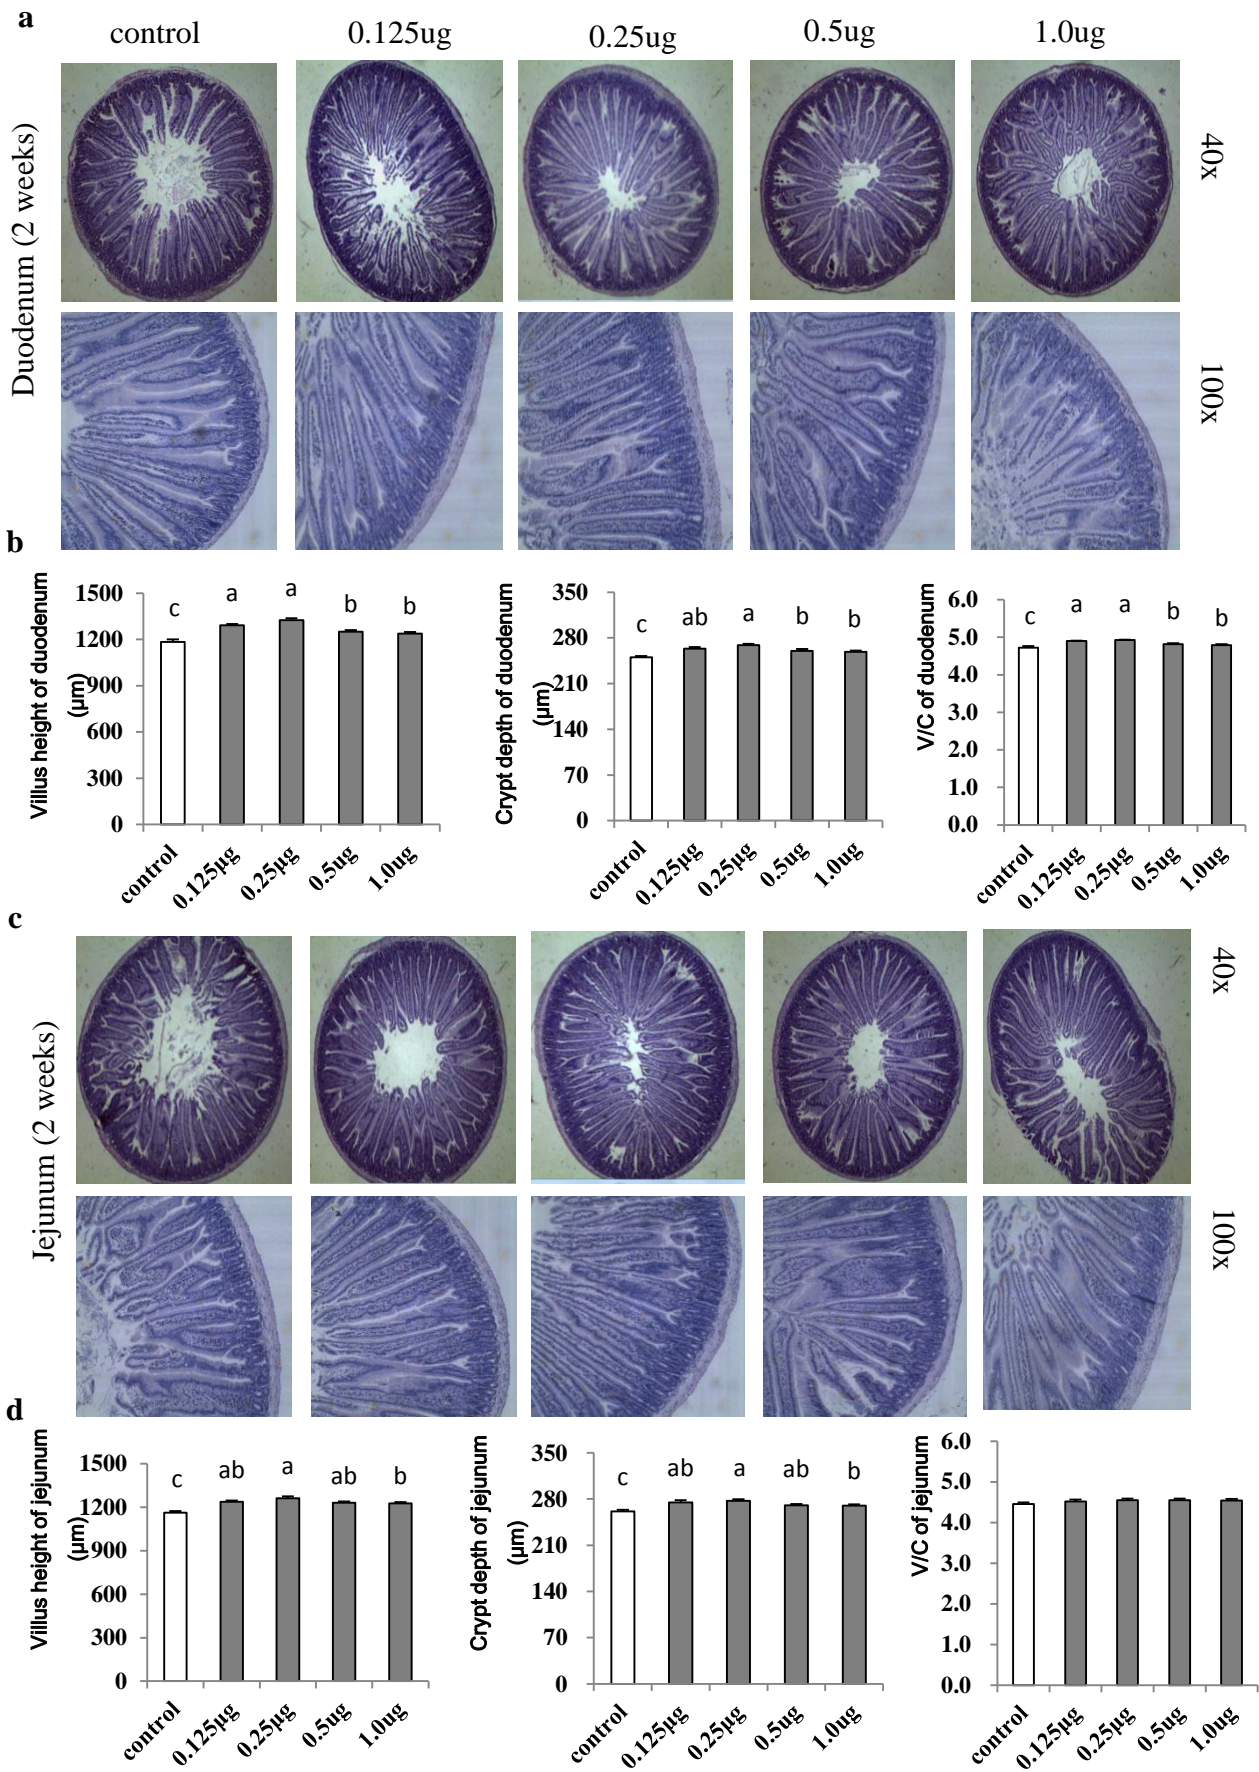

**Supplementary Figure 3.** Intestinal histomorphology observation and analysis (2 weeks). (a) The 0.125  $\mu\text{g}$ , 0.25  $\mu\text{g}$ , 0.5  $\mu\text{g}$  and 0.1  $\mu\text{g}$  treatment groups showed improved villus height and crypt depth compared with the control group by microscopy observation of the duodenum morphology (n = 6). (b) Statistical analysis of the villus height, crypt depth and V/C ratio showed significant improvement in different treatment groups (duodenum,  $P < 0.05$ , n = 30). (c) The 0.125  $\mu\text{g}$ , 0.25  $\mu\text{g}$ , 0.5  $\mu\text{g}$  and 0.1  $\mu\text{g}$  treatment groups showed improved villus height and crypt depth compared with the control group by microscopy observation of the jejunum morphology (n = 6). (d) Statistical analysis of all treatment groups showed significantly increased villus height and crypt depth, but the V/C ratio was not significantly changed (jejunum, n = 30).
